# Supplementary material for: Crosstalk Between DNA Methylation and Gene Mutations in Colorectal Cancer
Source: Front Oncol. 2021 Jul 1;11:697409. doi: 10.3389/fonc.2021.697409 (PMC8281955; doi:10.3389/fonc.2021.697409)
Supplement: Supplementary file 1 [file Table_1.xls]

## Sheet: Dtabase_CRC_Methylation
Table 1: Clinical, sociodemographical data and DNA methylation levels (%) of the individuals involved in the study.
Code	Case	KRAS/BRAF Mutation Status	Localization	Metastasis	Sex	Age	APC_%Met	CDH1_%Met	CDKN2A_%Met	DKK2_%Met	DKK3_%Met	HIC1_%Met	HNF1B_%Met	HS3ST2_%Met	MGMT_%Met	MLH1_%Met	OPCML_%Met	PCDH10_%Met	RASSF1_%Met	RUNX3_%Met	SFRP1_%Met	SFRP2_%Met	SFRP5_%Met	SPARC_%Met	TMEFF2_%Met	UCHL1_%Met	WIF1_%Met	WT1_%Met
87 T	Tumoral Tissue	KRAS G12V	Sigmoid		1	64	0.35	0.84	0.25	15.07	45.98	20.98	0.68	44.81	27.22	0.01	28	46.95	50.29	41.47	13.1	16.49	50.51	25.74	22.32	39.34	49.72	41.94
116 T	Tumoral Tissue	WT	Sigmoid		0	73	0	0.78	0.24	25.41	0.19	0.67	0.62	9.32	0.11	0	50.06	23.83	0.01	87.06	13.23	30.58	1.32	31.51	13.31	0.24	0.28	0.02
124 T	Tumoral Tissue	KRAS G13D	RSJ		0	40	0	1.9	0.24	14.01	0.2	1.26	1.04	0.08	0.06	11.11	16.05	7.59	0.02	69.43	30.79	0.43	1.8	21.25	6.75	0.47	18.56	0.14
127 T	Tumoral Tissue	WT	Rect		0	63	0	1.16	39.8	50	55.73	11.04	1.52	68.34	20.73	0.01	49.32	56.16	4.15	93.45	64.63	50	5.19	47.65	50	33.05	56.46	51.7
131 T	Tumoral Tissue	KRAS G12D, BRAF V600E	Sigmoid		0	55	0.63	0.97	0.2	57.55	53.5	7.57	1.46	67.2	0.07	0.07	58.72	64.82	0.03	76.63	76.87	18.32	1.88	69.31	76.33	0.38	57.64	0.12
132 T	Tumoral Tissue	WT	Colon		0	53	0.04	0.77	0.07	17.24	16.62	1.9	0.36	10.44	0.02	17.56	12.85	15.93	0.01	57.22	18.05	17.32	7.86	16.83	13.87	9.61	17.19	20.74
147 T	Tumoral Tissue	WT	RSJ		1	89	0.11	0.59	59.93	89.18	92.03	75.5	0.56	89.33	38.44	87.75	73.12	90.46	59.1	92.88	97.02	67	61.77	94.59	92.57	57.63	79.83	93.25
149 T	Tumoral Tissue	BRAF V600E	RSJ		1	63	40.05	1.8	0.11	74.15	83.73	75.62	1.56	85.33	0.68	0.01	64.54	79.11	50	88.11	84.68	82.76	10.65	68.24	71.48	64.14	77.29	82.81
150 T	Tumoral Tissue	WT	RSJ		1	72	16.27	1.71	0.11	20.84	14.09	13.69	0.65	59.94	0.09	0	16.98	17.2	2.8	61.12	26.26	23.16	0.97	24.24	15.71	11.35	21.02	0.15
156 T	Tumoral Tissue	KRAS G12D	Colon		1	58	0.04	1.27	0.18	7.64	0.16	0.48	0.42	0.06	0.04	0.03	0.48	0.85	0	62.82	0.79	0.17	0.77	14.38	1.29	0.34	0.27	0.04
158 T	Tumoral Tissue	KRAS G13D	Sigmoid		0	72	31.21	0.55	0.05	56.67	6.17	5.19	0.36	0.15	0.01	0	52.33	57.95	51.35	97.59	60.18	0.31	0.65	49.51	64.39	0.04	68.12	0.02
160T	Tumoral Tissue	WT	Colon		0	60	37.63	0.76	31.88	39.29	63.6	12.94	0.47	52.95	0.36	0.02	39.05	34.15	0	65.03	54.3	24.15	1.01	51.42	0.02	50.65	56.46	57.95
167 T	Tumoral Tissue	KRAS G12V	Colon	Hepatic	0	77	0.06	1.27	0.09	19.66	2.14	0.24	1.07	5.04	8.19	9.54	12.76	20.17	0	65.37	30.79	29.95	0.85	35.61	21.17	17.56	27.17	9.48
171 T	Tumoral Tissue	KRAS G13D	Colon		1	78	0	1.3	81.05	62.75	83.71	72.23	0.96	86.31	0.1	0	65.05	74.81	0.07	94.79	89.1	75.82	82.17	77.92	75.14	78.96	79.26	80.09
177 T	Tumoral Tissue	WT	Colon	Hepatic	1	77	1.15	0.39	0	79.22	91.2	80.09	0.98	66.31	0.05	0	63.57	79.96	88.01	77.63	82.43	80.23	59.53	85	84.18	72.79	90.45	89.19
182 T	Tumoral Tissue	BRAF V600E	Colon		0	67	0.07	0.89	85.51	88.22	87.56	79.07	1.59	87.16	0.5	89.63	62.55	86.69	0.03	98.94	83.56	86.5	83.66	82.27	84.49	84.91	87.32	89.63
101 T	Tumoral Tissue	KRAS G12D	Colon		1	62	17.8	1.06	0.16	66.19	67.64	2.14	0.42	80.64	43.24	0.03	50	66.32	34.15	96.77	73.38	66.29	67.87	67.21	65.37	68.32	66.55	69.65
102 T	Tumoral Tissue	BRAF V600E	Colon	Hepatic	0	60	20.16	1.347	42.71	80.185	85.655	77.112	1.536	87.111	0.58	44.79	63.539	82.7	25.014	93.425	83.9	83.56	45.23	73.46	76.82	75.24	81.42	85.26
87 NAT	Normal Adiacent Tissue	WT	Sigmoid		1	64	0.71	1.42	0.2	22.11	53.58	16.64	1.64	3.22	8.72	0.01	76.98	57.56	58.17	70.05	67.1	16.85	4.08	80.61	13.15	14.48	87.66	7.49
116 NAT	Normal Adiacent Tissue	WT	Sigmoid		0	73	0.68	1.96	0.04	6.35	1	0.89	0.97	0.97	0.09	0.18	16.85	5.68	0.31	58.05	8.32	4.67	1.71	44.08	2.45	1.15	52.68	0.43
124 NAT	Normal Adiacent Tissue	WT	Sigmoid		0	40	0.03	3.1	0.11	13.57	1.14	2.27	0.51	0.35	0.09	0.16	2.56	59.36	42.69	50	30.05	1.54	1.83	38.04	27.22	0.32	49.08	1.79
131NAT	Normal Adiacent Tissue	WT	Sigmoid		0	55	0.23	19.53	11.19	81.68	91.98	6.25	0.88	1.7	0.25	50	75	80.25	0.18	58.04	89.34	95.96	98.74	62.91	2.37	0.31	6.08	75.51
132 NAT	Normal Adiacent Tissue	WT	Colon		0	53	0.16	1.01	0.02	18.62	20.75	0.7	0.35	11.12	0.01	18.83	13.32	17.31	0.05	54.96	23.01	16.04	7.71	30.81	16.05	10.37	18.95	16.97
158 NAT	Normal Adiacent Tissue	WT	Sigmoid		0	72	0.39	1.34	0.07	1.56	0.47	5.04	0.41	0.36	0.04	0.07	3.72	1.18	0.35	59.28	1.32	0.85	0.58	14.87	1.1	0.18	1.91	0.44
160 NAT	Normal Adiacent Tissue	WT	Colon		0	60	83.73	89.91	82.44	84.49	82.42	88	78.64	77.89	85.44	85.94	81.82	81.82	0	26.28	0.18	0.25	0.23	1.08	0	0.14	0.16	0.12
171 NAT	Normal Adiacent Tissue	WT	Colon		1	78	1.91	2.44	0.09	3.99	0.24	1.7	0.31	0.09	0.09	0.05	3.08	1.71	0.32	50.65	2.23	0.65	0.55	35.52	0.71	0.3	10.37	0.07
182 NAT	Normal Adiacent Tissue	WT	Colon		0	67	0.02	0.75	0.4	1.25	0.32	53.01	0.79	0.23	2.75	0.09	0.34	0.5	0.13	10.82	0.31	0.3	1.21	4.53	0.24	0.6	1.38	0.09
101 NAT	Normal Adiacent Tissue	WT	Colon		1	62	0.75	5.36	1.05	3.52	4.58	3.21	0.8	4.77	0.31	0.05	3.93	8.48	0.56	39.73	10.3	3.67	4.22	32.24	1.87	2.29	7.13	2.78
1 C	Control Tissue	WT	Colon		0	38	4.19	16.45	3.28	13.62	4.24	3.68	3.3	0.35	4.17	6.59	14.36	4.57	1.8	50	1.4	5.19	6.86	36.05	3.55	18.23	4.51	0.97
2 C	Control Tissue	WT	Colon		0	58	0.27	1.85	0.76	5.08	0.59	2.29	0.5	0.42	0.5	0.29	3.33	2.49	0.39	53.92	2.4	1.05	0.93	25.57	0.98	1.5	7.8	0.73
3 C	Control Tissue	WT	Colon		1	60	2.61	3.04	1.33	10.14	1.73	5.7	0.73	0.35	1.09	1.39	19.8	8.13	0.93	34.19	7.92	1.07	1.22	34.68	2.43	3.13	14.19	0.45
4 C	Control Tissue	WT	Colon		0	58	3.22	3.37	1.26	3.7	3.6	6.19	0.61	0.41	1.14	1.63	3.43	2.11	0.97	36.86	1.72	1.05	0.91	18.64	1.01	1.6	4.24	0.4
5 C	Control Tissue	WT	Colon		0	80	1.11	12.03	2.56	4.37	1.57	3.85	0.99	53.67	10.58	0.35	5.96	7.43	0.26	66.59	2.47	2.54	2.73	53.35	1.4	1.95	2.57	1.96
6 C	Control Tissue	WT	Colon		1	70	2.28	7.348	1.838	7.382	2.346	4.342	1.226	11.04	3.496	2.05	9.376	4.946	0.87	48.312	3.182	2.18	2.53	33.658	1.874	5.282	6.662	0.902
116_CRC_Blood	Blood_CRC	WT			0	73	0.15	3	0.15	1.24	0.18	0.27	1.65	0.26	1.33	0.01	0.92	1.02	0.1	99.69	0.32	0.76	2.98	6.18	0.15	0.51	0.1	0.11
149_CRC_Blood	Blood_CRC	WT			1	63	0.07	3.25	0.02	0.3	0.09	0.09	0.71	0.21	0.58	2.82	0.18	0.29	0	99.77	0.09	0.1	0.86	2.32	0.03	0.11	0.04	0.09
150_CRC_Blood	Blood_CRC	WT			1	72	0	1.21	0.05	0.4	0.12	0.18	0.86	0.17	0.05	0.08	0.09	0.22	0.05	99.52	0.11	0.06	1.02	2.78	0.02	0.06	0.01	0.04
177_CRC_Blood	Blood_CRC	WT			1	77	0.15	1.15	0.01	0.32	0.07	0.09	0.37	0.16	0.01	0.01	0.13	0.15	0	99.59	0.04	0.06	0.46	2.85	0.02	0.08	0	0
182_CRC_Blood	Blood_CRC	WT			0	67	0.15	3	0.15	1.24	0.18	0.27	1.65	0.26	1.33	0.01	0.92	1.02	0.1	99.69	0.32	0.76	2.98	6.18	0.15	0.51	0.1	0.11
7 C_Blood	Blood_Control	WT			1	71	0.04	0.68	0.15	0.22	0.09	0.12	0.14	0.02	0.05	0	0.13	0.1	0.02	99.94	0.01	0.11	0.28	2.36	0.06	0.29	0	0.08
8 C_Blood	Blood_Control	WT			0	68	0.13	0.03	0.94	3.67	0.17	0.08	0.08	0.31	0.26	0.07	0.15	0.11	0.21	99.65	0.14	0.16	0.73	5.27	0.08	0.28	0.11	0.03
9 C_Blood	Blood_Control	WT			0	62	0.13	2.03	0.3	0.46	0.58	0.16	0.89	0.03	0.09	0.13	0.5	0.39	0	99.73	0.12	1.85	3.8	8.21	0.27	0.37	0.23	0.11
10 C_Blood	Blood_Control	WT			0	76	0	1.17	0.12	0.2	0.17	4.4	15.61	1.36	1.04	0.01	0.37	2.39	0.11	99.87	1.97	0.74	42.53	6.11	0.26	0.21	0.12	0.5
11 C_Blood	Blood_Control	WT			1	67	0	1.22	0.1	0.43	0.16	1.05	7.65	0.76	0.34	0	0.09	0.68	0.05	99.72	0.86	0.29	10.93	2.64	0.04	0.14	0.01	0.02
